# Supplementary material for: Artemisinins Target GABAA Receptor Signaling and Impair α Cell Identity
Source: PubMed Central journal article supplement — Cell. 2017 Jan 12;168(1-2):86–100.e15. doi: 10.1016/j.cell.2016.11.010 (PMC5236063; doi:10.1016/j.cell.2016.11.010), 2017-01-12
Supplement: mmc1.pdf [file mmc1.pdf]

## Supplemental Information

### **Artemisinin Target GABA<sub>A</sub> Receptor Signaling and Impair $\alpha$ Cell Identity**

**Jin Li, Tamara Casteels, Thomas Frogne, Camilla Ingvorsen, Christian Honoré, Monica Courtney, Kilian V.M. Huber, Nicole Schmitner, Robin A. Kimmel, Roman A. Romanov, Caterina Sturtzel, Charles-Hugues Lardeau, Johanna Klughammer, Matthias Farlik, Sara Sdelci, Andhira Vieira, Fabio Avolio, François Briand, Igor Baburin, Peter Májek, Florian M. Pauler, Thomas Penz, Alexey Stukalov, Manuela Gridling, Katja Parapatics, Charlotte Barbieux, Ekaterine Berishvili, Andreas Spittler, Jacques Colinge, Keiryn L. Bennett, Steffen Hering, Thierry Sulpice, Christoph Bock, Martin Distel, Tibor Harkany, Dirk Meyer, Giulio Superti-Furga, Patrick Collombat, Jacob Hecksher-Sørensen, and Stefan Kubicek**

**Table S1. Gene Sets used for GSEA. Related to Fig. 6.**

| V\$alpha    | V\$beta    | V\$endo    |          |               | V\$exo     |          |               |
|-------------|------------|------------|----------|---------------|------------|----------|---------------|
| AC018865.8  | ABI2       | A1CF       | FXYD5    | PTPRN         | AADAC      | FSTL3    | PREP          |
| AC140481.1  | AC009041.1 | ABCA5      | FXYD6    | QPCT          | ABRACL     | FTLP3    | PROM1         |
| ADORA2A     | ADCYAP1    | ABCC8      | G6PC2    | RARS2         | AC239811.1 | GADD45A  | PRPS2         |
| ARRDC4      | AL117190.2 | ABHD10     | GAD2     | RASSF6        | ACSS2      | GADD45B  | PRSS1         |
| ARX         | ALCAM      | AC027612.6 | GAS2     | RBM7          | ACTR1B     | GAS6     | PRSS3         |
| ASPH        | ALOX5      | AC140481.1 | GC       | RBP4          | ADH1C      | GATM     | PRSS3P2       |
| ASXL3       | AP3B1      | ACSL1      | GCG      | RFX6          | ADPRHL2    | GDE1     | PRSS8         |
| ATG7        | APCDD1L    | AHI1       | GCH1     | RGS4          | AIMP2      | GMNN     | PSAT1         |
| ATL2        | APLP2      | AKAP12     | GNA11    | RGS9          | AKAP7      | GNL3     | PWP1          |
| BAZ2B       | ATP2A3     | AL117190.2 | GNAS     | RIPPLY2       | AKR1C1     | GP2      | PYCR1         |
| BSDL2       | BMP5       | ALCAM      | GNG4     | RLIM          | AKR1C2     | GPRC5B   | RAB20         |
| C11orf24    | C1orf127   | AMACR      | GPX3     | RMI1          | AKR1C3     | GSTA1    | RAB32         |
| C18orf42    | C21orf119  | ANK1       | GPX7     | RNF130        | AKR7A3     | GSTA2    | RALB          |
| C19orf77    | CADM1      | ANKH       | GUCY1B3  | RP11-645C24.2 | ALB        | GSTM1    | RAMP1         |
| C21orf58    | CAPN13     | ANKRD12    | GYG1     | RP9           | ALDH1B1    | GSTM4    | RARRES2       |
| C4orf29     | CASR       | ANKRD36B   | HACL1    | RPP38         | ALDOB      | GYPC     | RCAN1         |
| CAMK2G      | CD72       | APBB1      | HEPACAM2 | RSPRY1        | AMY2A      | HAT1     | RCN2          |
| CD36        | CDH18      | APOBEC2    | HMGNA4   | RWDD4         | ANPEP      | HDCC3    | REG1B         |
| CDS2        | CDK5R1     | APTX       | HOOK2    | S100B         | ANXA3      | HES1     | REG3A         |
| CERCAM      | CGRRF1     | AQP3       | HSCB     | SCG2          | ANXA9      | HNMT     | REG3G         |
| CLU         | CNTN4      | ARG2       | IAPP     | SCG3          | APOBEC3B   | HSD17B2  | RHOV          |
| CTA-246H3.8 | CSDE1      | ARL6IP6    | IDS      | SCG5          | APOBEC3C   | HSPB8    | RIPK2         |
| DPP4        | CTSV       | ARMC2      | INA      | SCGB2A1       | AQP1       | IER3     | RNASE1        |
| EGFEM1P     | CYP2U1     | ASNSD1     | INS      | SCGN          | ATL3       | IFIH1    | RNF19A        |
| EGFL7       | CYYR1      | ATF7IP     | ISCA1    | SEC24D        | AZGP1      | IFITM2   | RP11-467L13.5 |
| ELL2        | DLK1       | ATG12      | ISL1     | SERGEF        | B3GNT2     | IFITM3   | RP5-1108M17.5 |
| EPG5        | EDARADD    | B9D1       | ITFG2    | SERTM1        | BCL10      | IFNAR1   | RP6-149D17.1  |
| EPHX2       | EFCAB14    | BAALC      | KATNBL1  | SESTD1        | BDH2       | IFT52    | RSU1          |
| ETFDH       | ELMO1      | BCHE       | KCNK16   | SH3GL2        | BICC1      | IL32     | S100A14       |
| F10         | ELOVL4     | BCKDHB     | KIAA1109 | SLC25A43      | BMP2       | IL8      | SCO1          |
| FADS2       | ENPP4      | BEX1       | KIAA1324 | SLC30A5       | C10orf54   | INSIG2   | SDC4          |
| FAM110B     | ENTPD3     | BEX2       | KIF3A    | SLC30A8       | C1orf116   | IQCK     | SERINC2       |
| FAM178A     | ERO1LB     | BEX5       | KIF9     | SLC35G2       | C1R        | KCNJ15   | SERPINA3      |
| FAM46A      | FAM222A    | BNIP2      | KPNA5    | SLC36A4       | C3         | KCTD14   | SERPINA4      |
| FAM84A      | FAM76A     | BRAP       | KRT40    | SLC7A8        | C8orf4     | KLK1     | SERPINA5      |
| FAP         | FFAR1      | BTG3       | LARP1B   | SLITRK6       | CA12       | KRT7     | SERPINA6      |
| FGF12       | G6PC2      | C1orf122   | LDOC1    | SMAD5         | CA2        | KRT8P48  | SERPINB8      |
| FSTL5       | GCC1       | C21orf119  | LEPR     | SMEK2         | CASP7      | KRTCAP3  | SERPING1      |
| FXYD5       | GNAS       | C22orf42   | LOXL4    | SMIM6         | CAV2       | LAD1     | SGK1          |
| GADD45G     | GPM6A      | C3orf14    | LRFN5    | SNAP25        | CCL2       | LAMC2    | SH2D4A        |
| GC          | GPSM1      | C6orf141   | LYRM5    | SNRPPF1       | CCND1      | LBH      | SLC38A2       |
| GCG         | GREM1      | CADM1      | MAFB     | SNX13         | CDC42EP1   | LCN2     | SLC38A5       |
| GLS         | GUSB       | CALB1      | MAP1B    | SPATA6        | CELA2A     | LGALS2   | SLC3A1        |
| GPR119      | GYG1       | CAND1      | MAP2K1   | SST           | CELA3A     | LGALS3   | SLC40A1       |
| GRIA3       | HSPD1      | CARTPT     | MAP2K6   | SSTR2         | CELA3B     | LGALS4   | SLC43A1       |
| HGD1A       | IAPP       | CBFB       | MAP6     | STAU2         | CFB        | LITAF    | SLC44A2       |
| HMGB2       | IGF2       | CBX1       | MAPRE2   | STMN2         | CFI        | LRRC40   | SLC44A4       |
| HMGB3       | INS        | CD200      | MBOAT4   | STXBP5L       | CFTR       | LYZ      | SMAD2         |
| HNRNPA3     | KLHDC8A    | CDCP1      | MDK      | SYT4          | CHMP6      | MAD2L1BP | SMPD2         |
| HPS1        | LGMN       | CDKAL1     | MED29    | SYT5          | CLDN1      | MALL     | SNRNP40       |
| HSD17B14    | LRR1M3     | CFP1       | METTL18  | TCEAL2        | CLMN       | MAT2B    | SPIN1         |
| HTR1F       | MAFA       | CHD9       | MOB1B    | TCEAL3        | CLPS       | MFSD5    | SPP1          |
| IRX2        | MRAP2      | CHGA       | MS4A8    | TCTA          | CNN3       | MGST1    | SQRDL         |
| ITPK1       | MTSS1      | CHGB       | MSANTD4  | TM4SF4        | CORO1C     | MIPEP    | STAP2         |
| KCNMA1      | MXRA7      | CKMT1A     | MXRA7    | TMEM128       | CPA1       | MKI67IP  | STK38         |
| KL          | NECAB1     | CKMT1B     | MYCBP    | TMEM168       | CPA2       | MMP7     | STXBP3        |
| KLHL41      | NKX6-1     | CLDND1     | MYO3A    | TMEM176A      | CREB5      | MRPL15   | STXBP6        |
| KPNA6       | NMRK1      | CMSS1      | NCK1     | TMEM176B      | CTGF       | MRPL44   | SYCN          |
| LOXL4       | NPTX2      | COA5       | NEMF     | TMEM39A       | CTNNA1     | MRPS12   | TACSTD2       |
| MBOAT2      | NTPCR      | COG1       | NEUROD1  | TMEM42        | CTRB2      | MRPS22   | TC2N          |
| MCOLN3      | OXL1D1     | COPRS      | NLRP1    | TMEM45B       | CTRC       | MSN      | TCEA3         |
| MLLT11      | PCSK1      | CPE        | NMRK1    | TMEM53        | CTRL       | MT2A     | TES           |
| MRC1        | PFKFB2     | CPSF3      | NNMT     | TMEM59L       | CTSH       | MUC20    | TESC          |
| MRC1L1      | PIGV       | CPVL       | NPTX2    | TMEM70        | CTSS       | MYC      | TFPI2         |
| MYBPHL      | PIK3IP1    | CRYBA2     | NSL1     | TMOD1         | CUZD1      | NARS2    | TGIF1         |
| NAA20       | RAPH1      | CTR9       | NT5C3A   | TOR1AIP2      | CXCL1      | NCEH1    | TINAGL1       |
| NHP2L1      | RASA4      | CXorf57    | NT5DC1   | TPR           | CXCL16     | NDUFAF4  | TM4SF18       |
| OGT         | RASA4B     | DCAKD      | OAT      | TRAV8-5       | CXCL17     | NECAP2   | TMEM184C      |
| PALLD       | RASGRF1    | DDX3Y      | PAK3     | TRMT11        | CXCL2      | NEURL3   | TMEM27        |
| PDE4DIP     | RBP4       | DENND5B    | PAM      | TSPAN1        | CXCL6      | NINJ1    | TMEM43        |
| PDZK1       | RGS16      | DFFA       | PAN2     | TSPAN2        | CYR61      | NIT2     | TMEM87B       |
| PLA2G16     | RNF130     | DHRS2      | PAPOLG   | TSPAN7        | DAB2       | NOB1     | TMEM97        |
| PLCE1       | ROBO2      | DHX29      | PAPPA2   | TTC32         | DCDC2      | NQO1     | TMSB4XP6      |

| V\$alpha | V\$beta  | V\$endo       |          |               | V\$exo  |          |           |
|----------|----------|---------------|----------|---------------|---------|----------|-----------|
| PLOD2    | RRAGB    | DIRAS3        | PAX6     | TTR           | DCTPP1  | NQO2     | TMSB4XP8  |
| PMM1     | RRNAD1   | DKFZP761J1410 | PCM1     | UBQLN1        | DDIT4   | NTRK2    | TNFAIP2   |
| PNISR    | SALL2    | DLK1          | PCP4     | UCHL1         | DEFB1   | NUAK2    | TPST2     |
| POPDC3   | SCD5     | DNAJC12       | PCSK1    | USP18         | DHRS3   | NUPR1    | TRIB1     |
| PRKCE    | SEMA5A   | DUSP26        | PCSK1N   | VAMP2         | DHRS7B  | OLFM4    | TRIM5     |
| PTPN2    | SFTPA1   | EFCAB7        | PCSK2    | VDAC1P8       | DUOXA2  | OSTF1    | TRPV6     |
| RAB3C    | SGCB     | EGR3          | PDE4DIP  | VLDLR         | DUSP5   | PACSIN2  | TRUB2     |
| RSAD2    | SGK3     | EGR4          | PDLIM4   | VWA5A         | EDN1    | PDCD2    | TST       |
| SETD2    | SIAH1    | ELMO1         | PEMT     | WI2-1896O14.1 | EEPDI   | PDGFD    | TTC4      |
| SGCZ     | SLC25A34 | EMC2          | PFKFB2   | YIPF6         | EFEMP1  | PDIA2    | U66061.39 |
| SLC38A4  | SLC30A8  | ENO1P1        | PIGK     | ZDHHC4        | EFTUD2  | PDLIM3   | UGT2A3    |
| SORT1    | SLC43A2  | ENO2          | PIGP     | ZFAND2A       | EIF2B1  | PDLIM7   | UGT2B15   |
| SPATC1L  | SOCS2    | ENPP2         | PJA2     | ZKSCAN1       | ENC1    | PDZK1IP1 | UPK1B     |
| SPOCK3   | SORL1    | ENPP5         | PKIB     | ZNF397        | ERP27   | PHGDH    | VTCN1     |
| SRBD1    | SRD5A1   | ENTPD3        | PLAC8    | ZNF44         | ETS2    | PHLDA2   | XPNPEP1   |
| SREK1    | SUSD4    | ESYT1         | PNMAL1   | ZNF502        | F2RL1   | PIGR     | XRN2      |
| STARD3   | SYT13    | FABP5         | PNRC1    | ZNF583        | F3      | PLA2G1B  | ZC3H12A   |
| TBC1D30  | TBCC     | FABP5P7       | PIIH     | ZNF765        | FAM204A | PLLP     | ZFP36L1   |
| TMCO3    | TDRP     | FAM105A       | PPP1R1A  |               | FAM3B   | PLS3     |           |
| TMEM236  | TERF2IP  | FAM13A        | PPP2R3C  |               | FAM47E  | PLTP     |           |
| TTC39A   | TMEM37   | FAM159B       | PPP6R3   |               | FBXO25  | PNLIP    |           |
| TTR      | TSPAN1   | FAM167A       | PPY      |               | FBXO34  | PNLIPRP1 |           |
| UBQLN1   | VATIL    | FAM46A        | PRAF2    |               | FGL1    | PNLIPRP2 |           |
| UQCC1    | WNT4     | FAP           | PRCP     |               | FLNA    | PPAP2C   |           |
| VGf      | WSCD2    | FEV           | PSTK     |               | FLRT2   | PPIC     |           |
| WDR37    | ZNF441   | FFAR1         | PTGES3P2 |               | FOSL1   | PPIL4    |           |
| YIPF2    | ZNF776   | FRZB          | PTPN2    |               | FSTL1   | PPP6C    |           |

**Table S2. Primer Sequences.** Related to Methods and Resources.

| Gene | Species | Forward primer       | Reverse primer       |
|------|---------|----------------------|----------------------|
| ARX  | Human   | CTGCTGAAACGCAAACAGAG | TTCTGGAACCAGACCTGGAC |
| Gcg  | Mouse   | GAAGACAAACGCCACTCACA | CAGCATGCCTCTCAAATTCA |
| Mnx1 | Mouse   | AATGGAAACGCAAAG      | CCATTGCTGTACGGGAAGTT |

**Table S3. Islet Donor Information,** Related to Methods and Resources.

| Donor   | Gender | Age | BMI   |
|---------|--------|-----|-------|
| Donor 1 | M      | 47  | 27.5  |
| Donor 2 | M      | 37  | 22    |
| Donor 3 | F      | 62  | 29.8  |
| Donor 4 | M      | 39  | 22.2  |
| Donor 5 | F      | 56  | 26.56 |
| Donor 6 | M      | 17  | 21.5  |
